# Supplementary material for: Mechanism of Deletion Removing All Dystrophin Exons in a Canine Model for DMD Implicates Concerted Evolution of X Chromosome Pseudogenes
Source: PubMed Central journal article supplement — Mol Ther Methods Clin Dev. 2016 Dec 24;4:62–71. doi: 10.1016/j.omtm.2016.12.001 (PMC5363321; doi:10.1016/j.omtm.2016.12.001), 2016-12-24
Supplement: mmc1.pdf [file mmc1.pdf]

**OMTM, Volume 4**

**Supplemental Information**

**Mechanism of Deletion Removing All Dystrophin**

**Exons in a Canine Model for DMD Implicates**

**Concerted Evolution of X Chromosome Pseudogenes**

**D. Jake VanBelzen, Alock S. Malik, Paula S. Henthorn, Joe N. Kornegay, and Hansell H. Stedman**

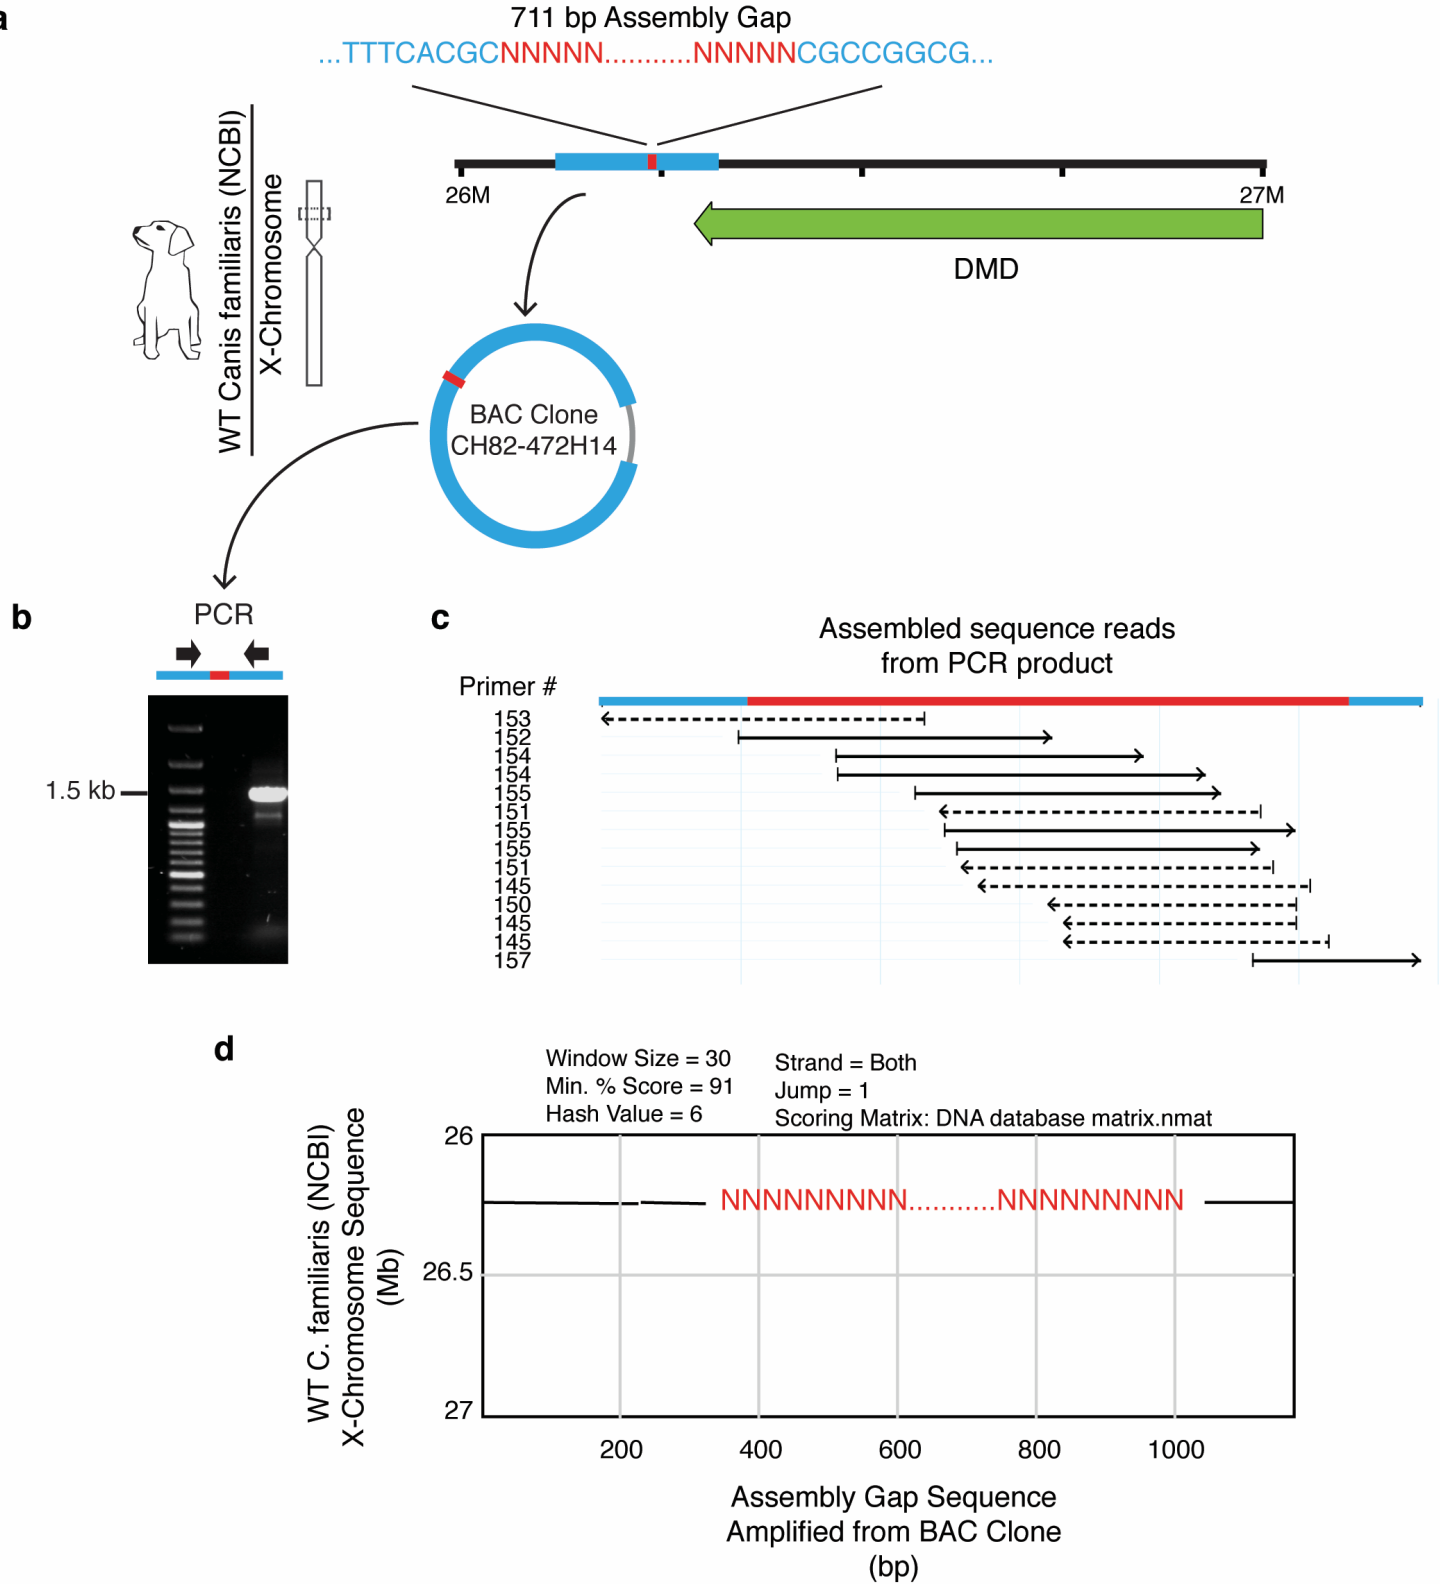

**Figure S1.** Sequencing of assembly gap in dog reference genome near telomeric breakpoint of GSHPMD deletion. **(a)** A region of the reference dog X-chromosome is shown. The region of the X-chromosome contained within the library BAC clone is highlighted in blue. The assembly gap is shown in red. BAC, bacterial artificial chromosome. N, any nucleotide. **(b)** Primers, depicted by arrows, that anneal outside opposite ends of the assembly gap were used to PCR amplify across the assembly gap using the BAC clone as template. PCR products are displayed on an agarose gel following electrophoresis. **(c)** The gel-purified PCR product was Sanger sequenced using the indicated primers, and overlapping reads were assembled into a single contig. **(d)** Pustell matrix comparing the sequenced PCR product to the indicated region of the dog X-chromosome reference sequence. Internal break in homology is expected and represents the assembly gap in the dog reference sequence, which is depicted by a stretch of red N's.

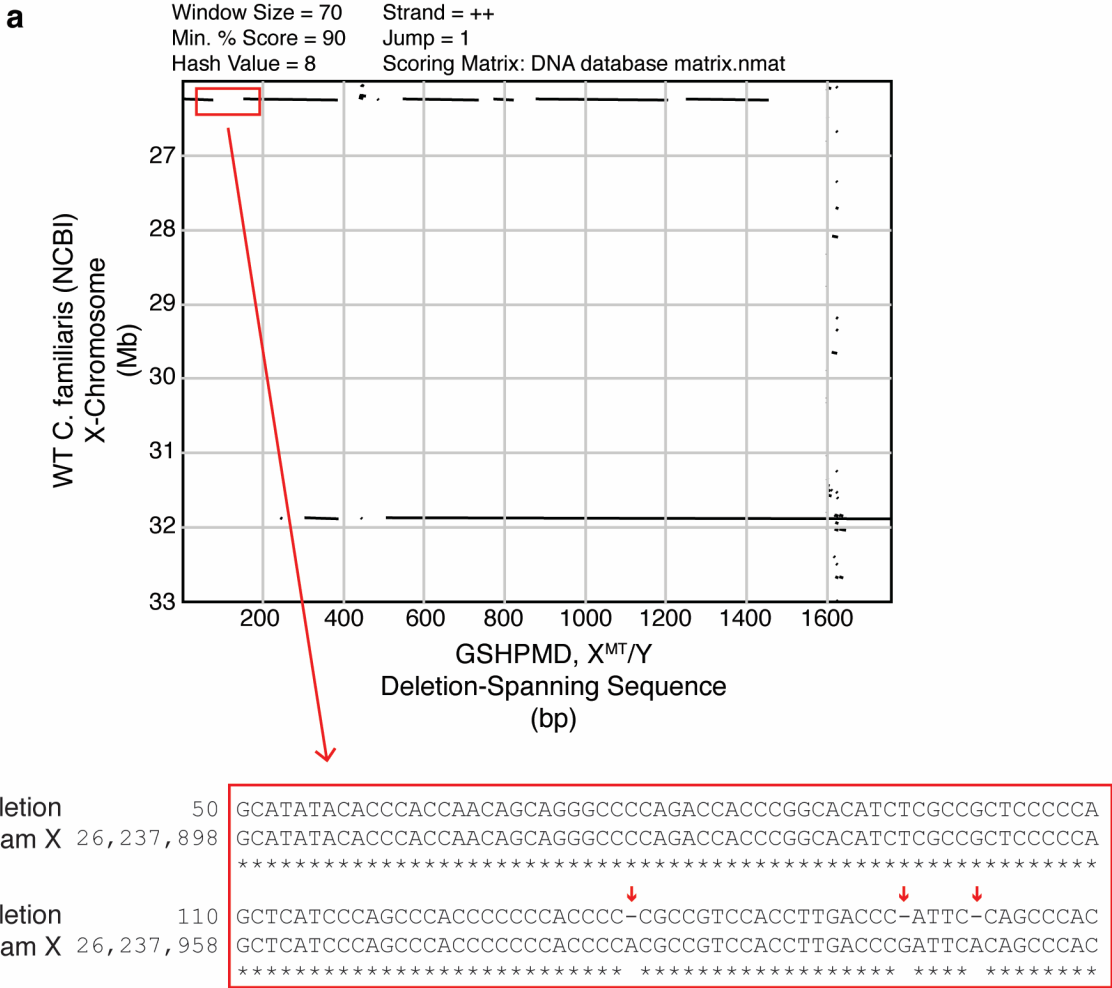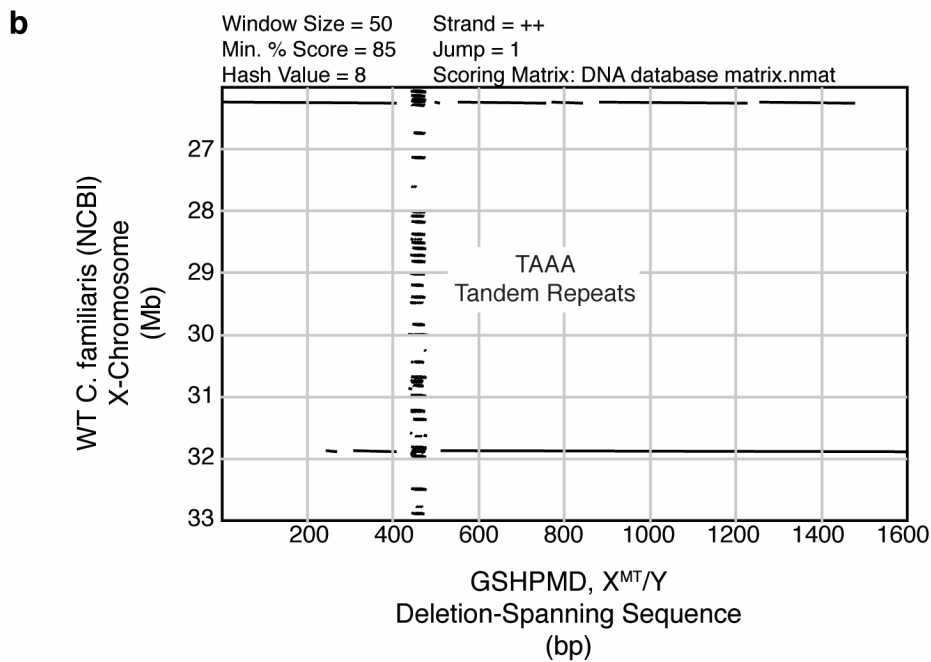

**Figure S2.** Investigation of breaks in homology between GSHPM deletion-spanning sequence and dog genome reference sequence. **(a)** Pustell matrix comparing deletion-spanning sequence from GSHPM to a region of the dog X-chromosome reference sequence. Red box highlights a break in sequence homology near the telomeric breakpoint, and a ClustalW alignment of the corresponding sequences is shown below. Red arrows indicate three indels responsible for the observed lapse in homology. **(b)** Pustell matrix, with reduced specificity parameters, depicting the presence of a TAAA tandem repeat present in this region of the dog X-chromosome.



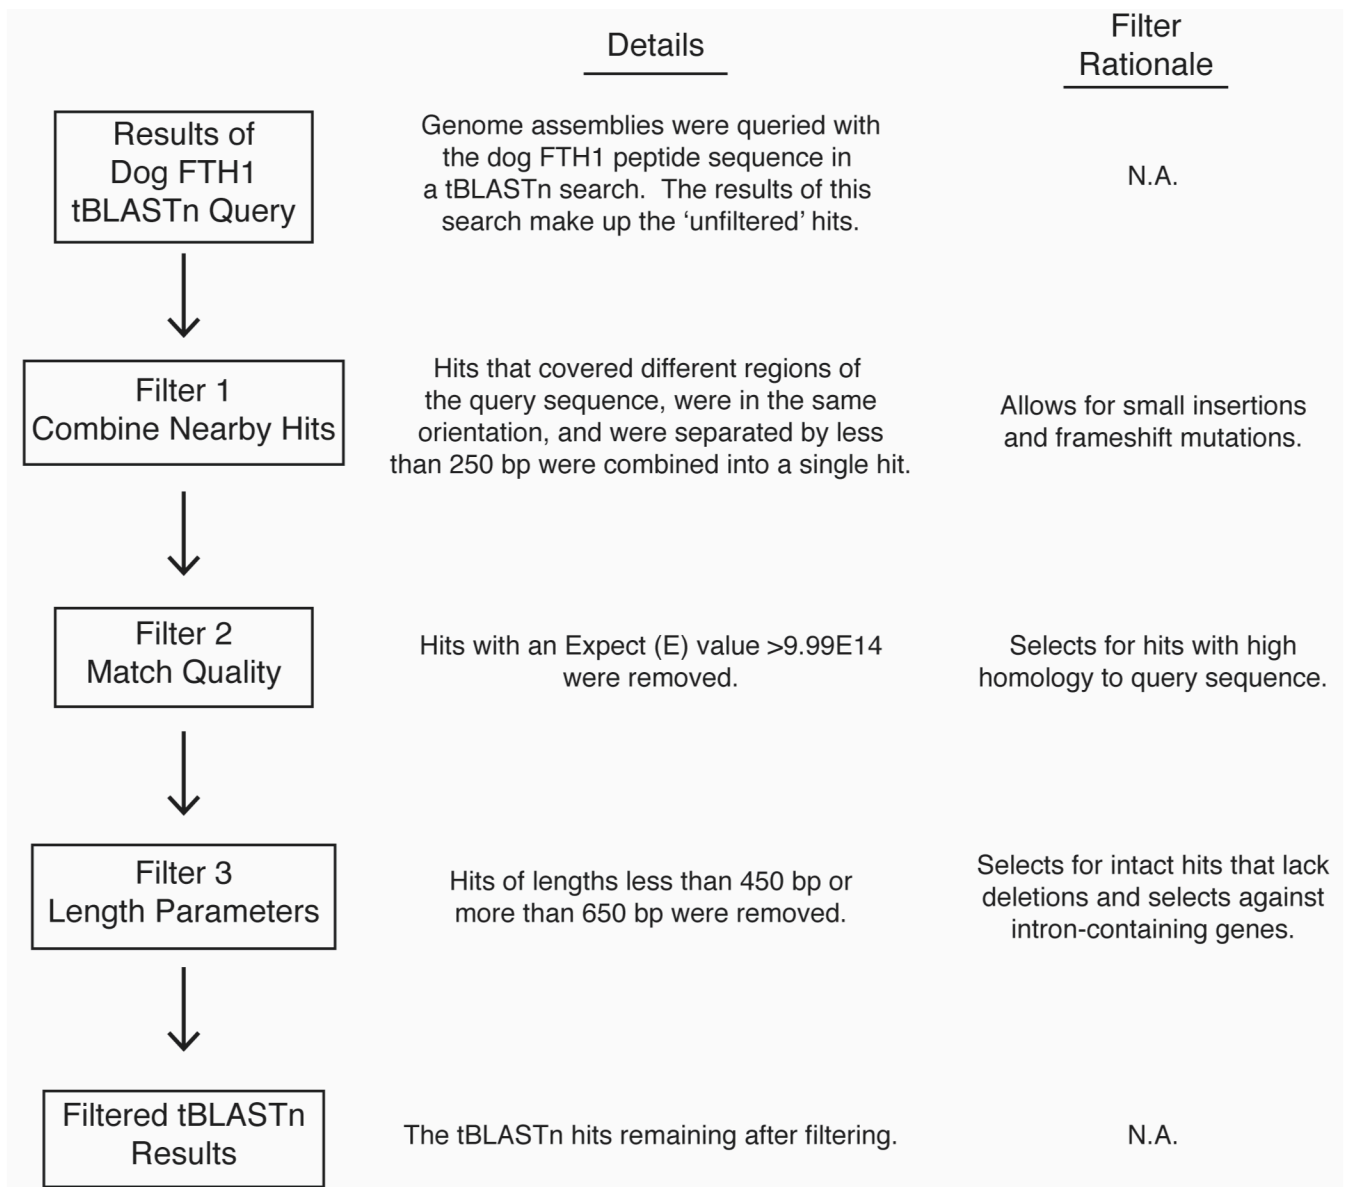

**Figure S4.** Schematic of filtering process of tBLASTn hits. The reference genomes of several species were queried with the dog FTH1 peptide sequence using tBLASTn. The returned hits from this search were filtered as indicated, with the goal of selecting for FTHL loci.

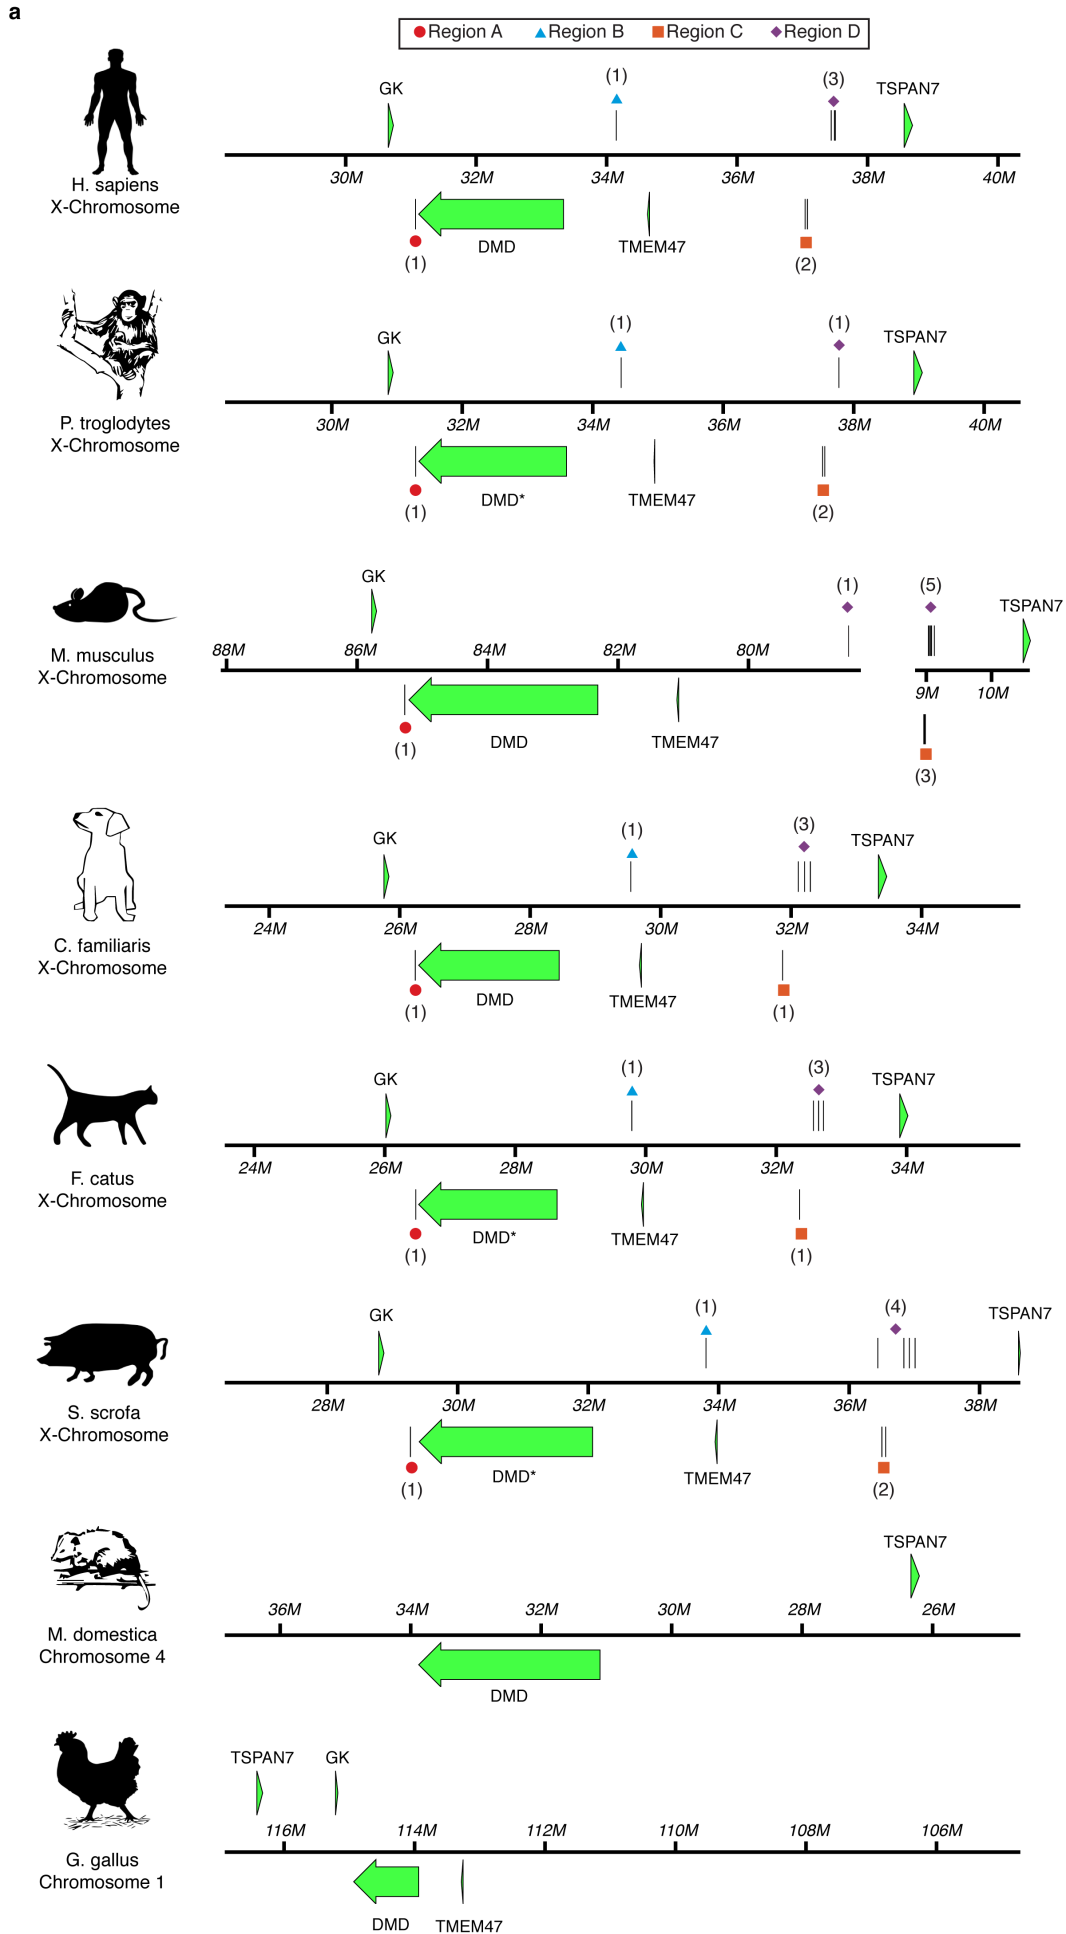

**Figure S5.** Phylogenetic analysis of identified FTHL loci from tBLASTn search (expanded to additional species). **(a)** Comparison of syntenic portion of dystrophin-containing chromosome from each species showing the grouping of FTHL loci to four regions, labeled A, B, C, and D. The opossum and chicken lack FTHL loci in these regions. Number of pseudogenes present in reach region is indicated in parenthesis.

**b**

Method: Neighbor Joining; Best Tree; tie breaking = Systematic  
 Distance: Jukes-Cantor; Gamma correction = Off  
 Gaps distributed proportionally

● Region A   ▲ Region B   ■ Region C   ◆ Region D

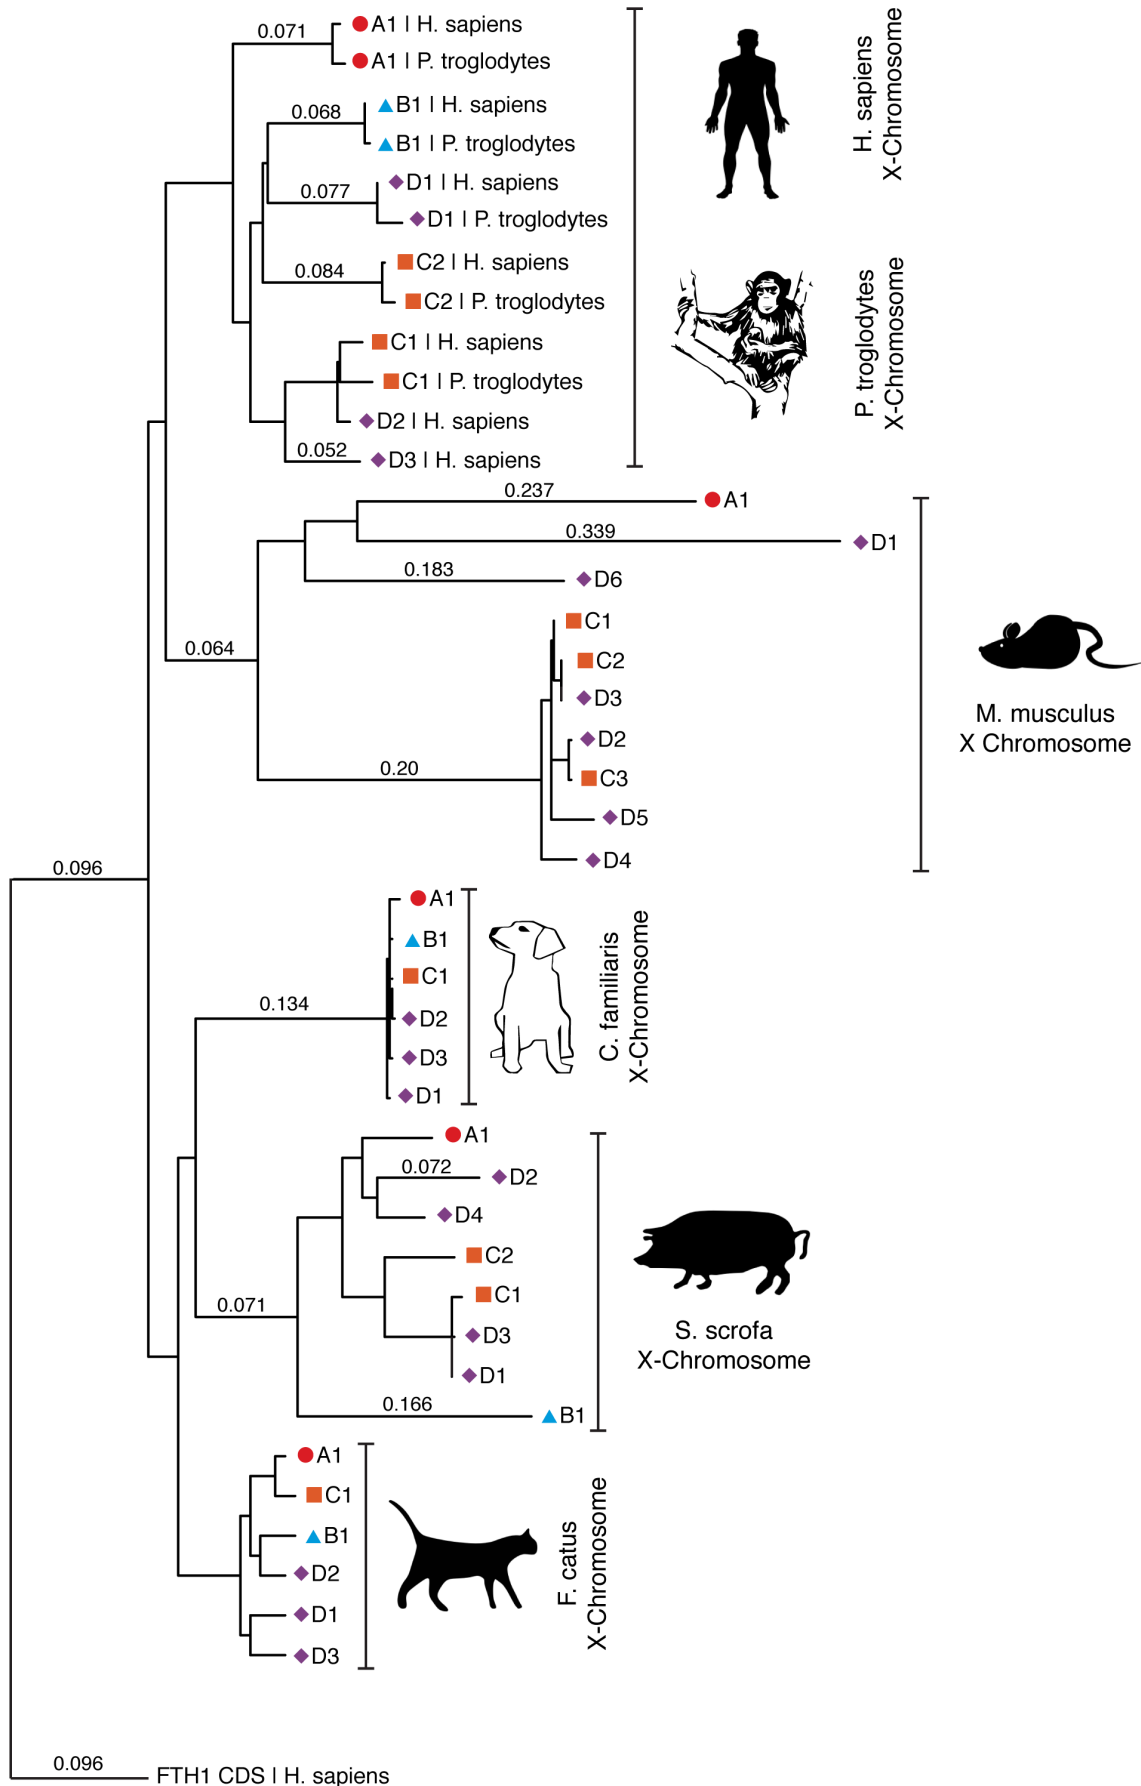

**Figure S5.** Phylogenetic analysis of identified FTHL loci from tBLASTn search (expanded to additional species). (b) Phylogeny of identified FTHL loci. The human FTH1 CDS is used as an outgroup. Branches with values less than 0.05 are not displayed. Tree-building parameters are provided as text in figure. CDS, coding DNA sequence.

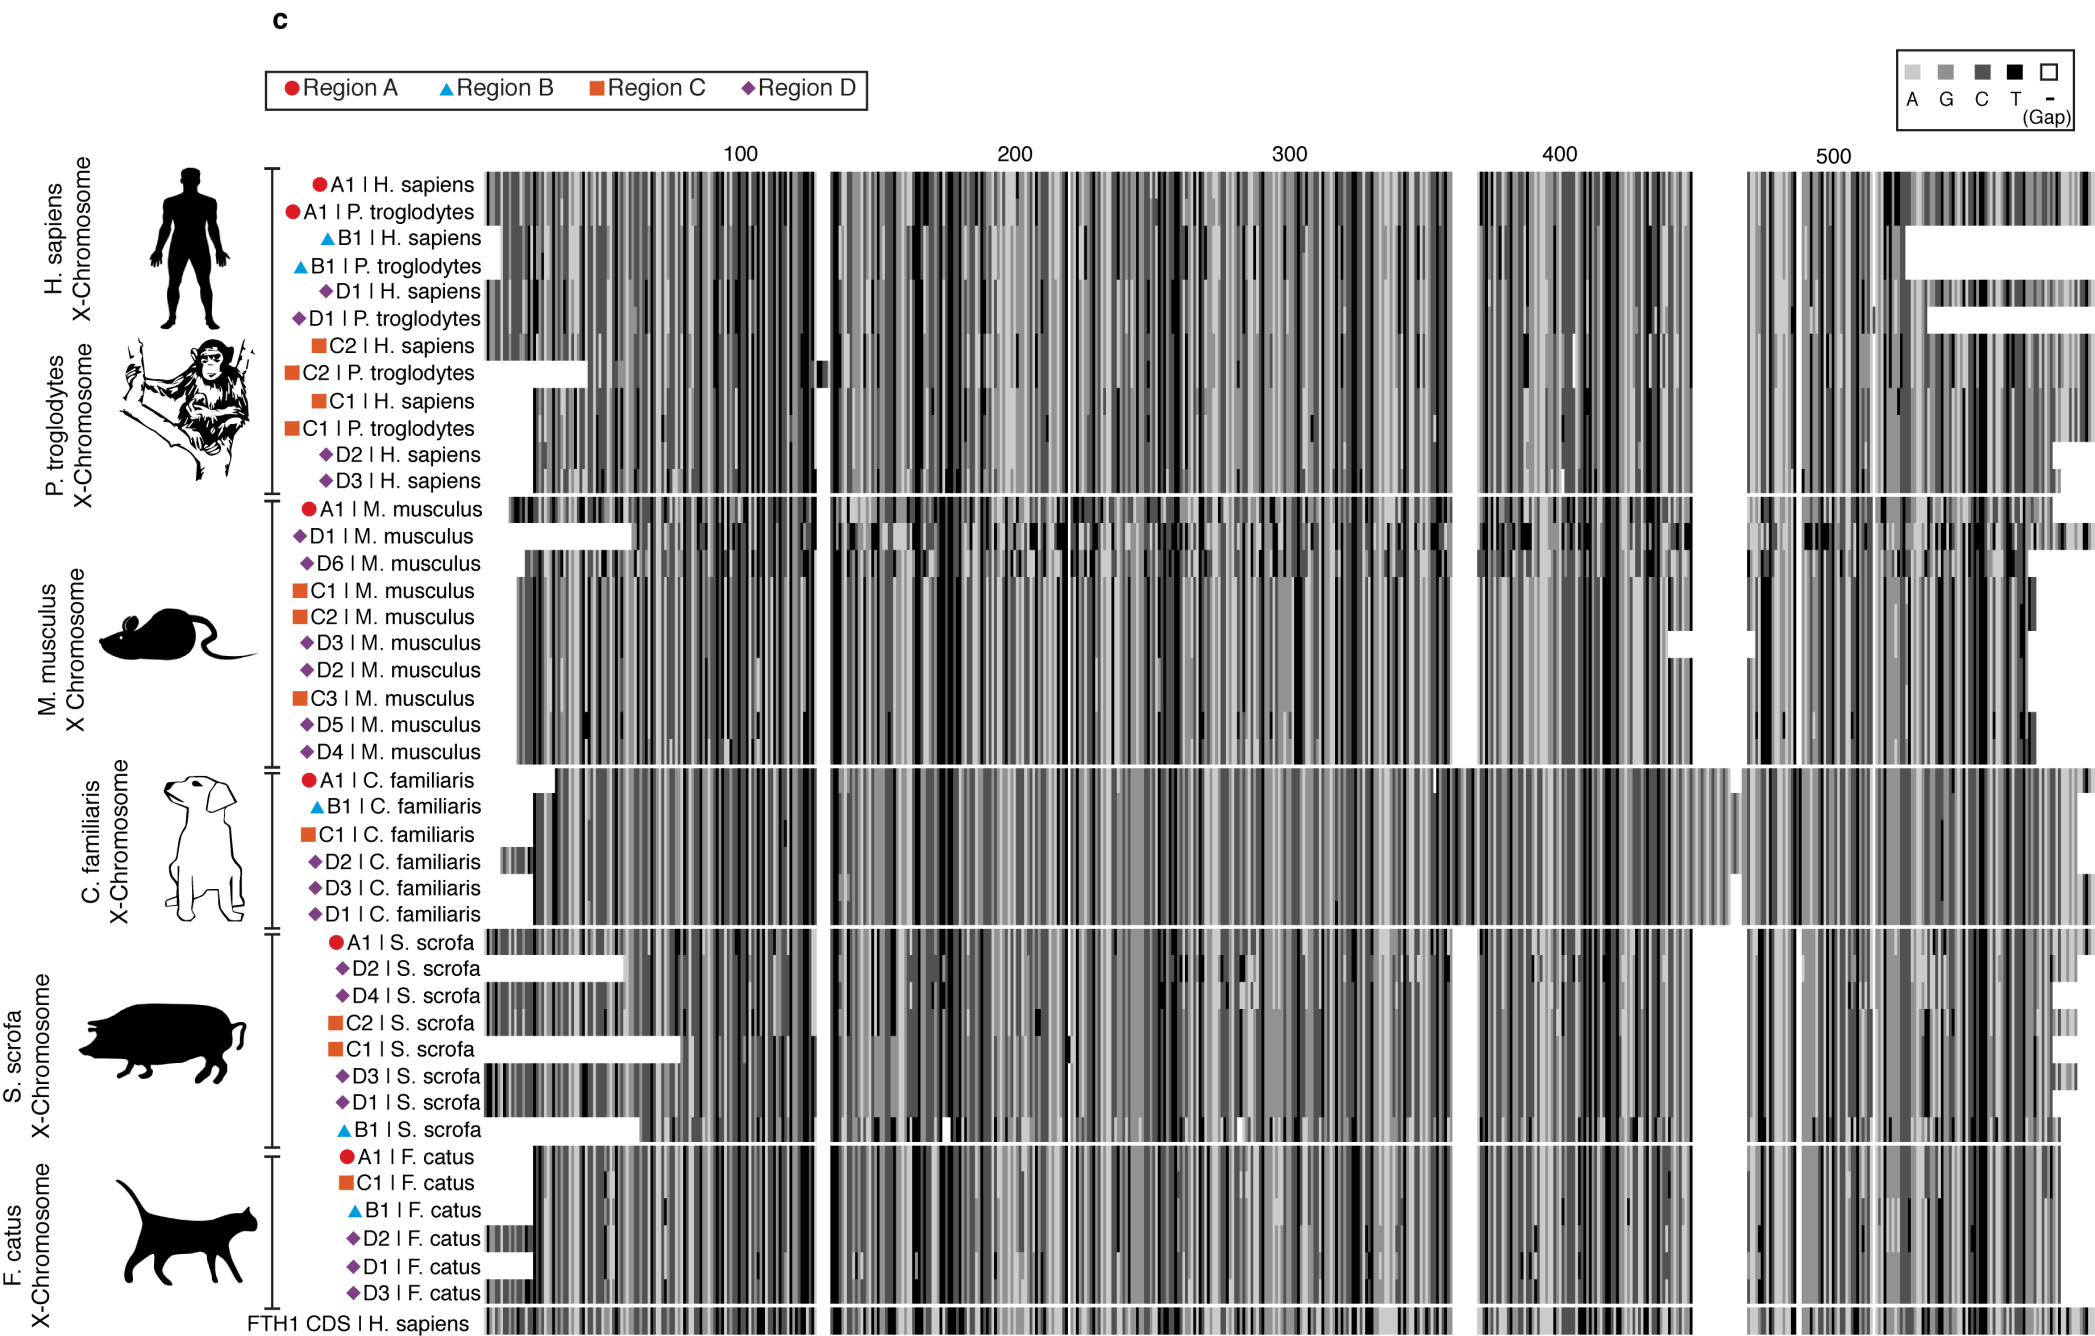

**Figure S5.** Phylogenetic analysis of identified FTHL loci from tBLASTn search (expanded to additional species).  
**(c)** ClustalW multiple DNA sequence alignment of identified FTHL loci. Note sequence homology among FTHL loci from all regions is unique to the dog.



Sequence: AGap Sequence Range: 1 to 1173

```

AGap Sequence      10      20      30      40      50      60      70      80      90     100
TCTTGAAGGTTTCATGCAAGGCAATACTGCACATGCACGCTCGGGGGGGCCCAAGGAAAGTGCCTCGGGCTCCCGGGGAGGTGTCCGTCC

CfaX +
26238379 26238389 26238399 26238409 26238419 26238429 26238439 26238449 26238459 26238469
A.....>
AGap Sequence      110     120     130     140     150     160     170     180     190     200
AGGTCAAGTTCCTTTGTGCTGTGCGAGGGTGAAGCTGTGTAAGGGTACTTGGCAGGCCGCTTCGGGGGCCCCACAGCTGCAGAGCTGTGTCGG

CfaX +
26238479 26238489 26238499 26238509 26238519 26238529 26238539 26238549 26238559 26238569
.....A..G.....>
AGap Sequence      210     220     230     240     250     260     270     280     290     300
TAGCTCCACAGAGCTCTTGATGGCTTGCCTCTGCTGCTGCTGCTCACGGAGGTAGGGGCTCCAGGAGTGCAGAGCTGGAGCTGCTTCTGCTC

CfaX +
26238579 26238589 26238599 26238609 26238619 26238629
.....G..T>
AGap Sequence      310     320     330     340     350     360     370     380     390     400
GGTGGACAGCCGCTGAGGTAGGTGGAGGACAGAGCTGTGGTTCAGAGCTTCTTCAGGTGCAGAGGAGGCTGCTGTGGCTCGGGGCTCTCCAG

CfaX +
26238689 26238699 26238709 26238719 26238729
.....T...T...>
AGap Sequence      410     420     430     440     450     460     470     480     490     500
GGCTGGGGTGGGCTCTTAGAGCTGGGACAGAGGATGGGGCCCCGGGGCTGTGTGAGCTCACAGAGCATCTGGGCTGCTGCTCTCTCCGGG

AGap Sequence      510     520     530     540     550     560     570     580     590     600
CCTGGGCTGGAGAAAGGGGCAAGTTCCTCAGGGGCCCTGCTGGGCTCAAGAGGAAAGGCTGAGCTGTAGAGCTAGAGAGGAGCAGAGCTCCAG

AGap Sequence      610     620     630     640     650     660     670     680     690     700
GCTGATCGGCTTGTGAGGGGCTCTGCAGTCTGGGCTAGTCTGGGAACTGGGAAATGGGCGGCGGCAAGGCTGGGGCCGGGGGGGGGGGG

AGap Sequence      710     720     730     740     750     760     770     780     790     800
GGGGGGGAGGGGGGGGGGGGGGAGGGGAGGGGGCCACGGCGGAGAGAGGCTCGGGGCGCARTGGCGGTGGGGGAGTCTCGGTTGTTGT

AGap Sequence      810     820     830     840     850     860     870     880     890     900
CCAGGCTGGAGGCCAGAGAGGCTCTGCGGCTCGCTGGGCTGTGATGCGGAGAGGAGATCCCTTAAAGTCCGTTGTTGAGGTGGAGGTGA

AGap Sequence      910     920     930     940     950     960     970     980     990     1000
ATCCCTTAGCGGGGGGGGGGGTCAAGTCAAGCAGAGGGGGGGGAGGTTAGGGGGGGGGGCTGCTGCGGGGAGCGGGGAGGGGGCTGGCAGGGA

>=510p
AGap Sequence      1810    1820    1830    1840    1850    1860    1870    1880    1890    1180
GTGGCCCGGGGGGGGGGGCAGAGGTGTGGAGGGCTGGGAGGGCTGGCCGTTGGCGGGGCGAGGGCTGGCCGGCGGGGGCTGGGG

CfaX +
26239489 26239499 26239509 26239519 26239529 26239539
|.....>
AGap Sequence      1110    1120    1130    1140    1150    1160    1170
CGGGGGGGGACCGCTTCAAGGTTCCATCTGAGTCTGGGCGGGGAGAGGCAAGGGAGTCTGATCTTC

CfaX +
26239549 26239559 26239569 26239579 26239589 26239599 26239609
|.....>
AGap Sequence      1110    1120    1130    1140    1150    1160    1170
CGGGGGGGGACCGCTTCAAGGTTCCATCTGAGTCTGGGCGGGGAGAGGCAAGGGAGTCTGATCTTC

```

Figure S8. Sequence alignment of BAC-derived PCR product and assembly gap region of the dog X-chromosome reference sequence. Alignment corresponds to output from Pustell matrix in Figure S10.





| Primer Pair | Primer Number                | Sequence (5'-3')           | X-Chromosome Annealing Region |          | Annealing Temp. (°C) | Amplicon Size | PCR Results (Yes/No) |          |
|-------------|------------------------------|----------------------------|-------------------------------|----------|----------------------|---------------|----------------------|----------|
|             |                              |                            | Start                         | Stop     |                      |               | WT-Hsa               | GNPM-Hsa |
| 1           | 1                            | 5'GTGGTCTGATGCTGCTTCTTC    | 23152290                      | 23152313 | 61                   | 231           | Y                    | Y        |
|             | 2                            | 3'GCCAGGAAATTTCCAGGAAG     | 23152497                      | 23152520 |                      |               |                      |          |
|             | 3                            | 5'TGGTGGTCTGCAACACAC       | 23960538                      | 23960560 |                      |               |                      |          |
|             | 4                            | 4'TGGCCAGGACAGTGGGGAG      | 23960689                      | 23960710 |                      |               |                      |          |
|             | 5                            | 5'AAGGCGATGCTGCTAGGGTGTG   | 24750036                      | 24750058 |                      |               |                      |          |
|             | 6                            | 4'TAGAGCTGCTGCTGGCTC       | 24750057                      | 24750076 |                      |               |                      |          |
|             | 7                            | 5'TGGTGAAGCCACACTAGC       | 25330610                      | 25330630 |                      |               |                      |          |
|             | 8                            | 3'CACTCCCACTGCTTGAAGCC     | 25330825                      | 25330847 |                      |               |                      |          |
|             | 9                            | 5'CTCTCTGTGCTGGAG          | 26346126                      | 26346147 |                      |               |                      |          |
|             | 10                           | 10'CTCATGGGTGCTCCAGTT      | 26345431                      | 26345470 |                      |               |                      |          |
|             | 11                           | 11'CTCATGTAAGAGGGGG        | 26176440                      | 26176501 |                      |               |                      |          |
|             | 12                           | 12'GTAGAGTCTGTGCTGTGG      | 26174609                      | 26174638 |                      |               |                      |          |
|             | 13                           | 13'CTCAAGAGCACTGCCA        | 26384245                      | 26384264 |                      |               |                      |          |
|             | 14                           | 14'GTGGAGGAGATGCTGAGC      | 26384380                      | 26384399 |                      |               |                      |          |
|             | 15                           | 15'CACTTCCCTTGGCTCTC       | 26194195                      | 26194214 |                      |               |                      |          |
|             | 16                           | 16'GAGAAACCGGACTTGTCTCA    | 26349922                      | 26349942 |                      |               |                      |          |
|             | 17                           | 17'CTCTTGGCTATTGTTCTCA     | 26204548                      | 26204587 |                      |               |                      |          |
|             | 18                           | 18'ACAGATCCCAAGACCTCT      | 26204974                      | 26204993 |                      |               |                      |          |
|             | 19                           | 19'GGAGACGTGGAGTGTGACT     | 26214222                      | 26214241 |                      |               |                      |          |
|             | 20                           | 20'AGGATGCTGCTGACATGTA     | 26214897                      | 26214917 |                      |               |                      |          |
|             | 21                           | 21'CACTCCACACAAAGCCGA      | 26224113                      | 26224132 |                      |               |                      |          |
|             | 22                           | 22'ACTGTAGTCCCAAGACAA      | 26224713                      | 26224732 |                      |               |                      |          |
|             | 23                           | 23'CTCATCTAAGAGCCAGAT      | 26232427                      | 26232446 |                      |               |                      |          |
|             | 24                           | 24'CACTTTTGTGCTGTCAAA      | 26233390                      | 26233409 |                      |               |                      |          |
|             | 25                           | 25'AACTCTGCTAGGAGACA       | 26233393                      | 26233412 |                      |               |                      |          |
|             | 26                           | 26'CTCTTTGTGAGTGTGGATGA    | 26234469                      | 26234490 |                      |               |                      |          |
|             | 27                           | 27'AGCAATGATGGCACTGT       | 26235187                      | 26235206 |                      |               |                      |          |
|             | 28                           | 28'TCCCTGTGAGACGCTGTG      | 26235531                      | 26235550 |                      |               |                      |          |
|             | 29                           | 29'TGAGACCCCGTACCATAG      | 26236154                      | 26236173 |                      |               |                      |          |
|             | 30                           | 30'ATGATAGTTCCGCTGGTC      | 26236525                      | 26236544 |                      |               |                      |          |
|             | 31                           | 31'CTGCTGGTGGAGTGTGAT      | 26237046                      | 26237065 |                      |               |                      |          |
|             | 32                           | 32'CTGCTGTGTGGGTGTAT       | 26237902                      | 26237921 |                      |               |                      |          |
|             | 33                           | 33'AGCTTCAGATGCTCACT       | 26239551                      | 26239570 |                      |               |                      |          |
|             | 34                           | 34'AAAGAGCTCAAGAGGACCT     | 26239826                      | 26239845 |                      |               |                      |          |
|             | 35                           | 35'GTCTCATATGATGGTGTACT    | 26241080                      | 26241103 |                      |               |                      |          |
|             | 36                           | 36'CACTCATTTTCTGACTCTG     | 26241553                      | 26241576 |                      |               |                      |          |
|             | 37                           | 37'GAGAGAGGACCAAGCAATA     | 26242082                      | 26242103 |                      |               |                      |          |
|             | 38                           | 38'TTGATGATAGGGAGAGAG      | 26242661                      | 26242682 |                      |               |                      |          |
|             | 39                           | 39'CACTTCAGTCCCTCTC        | 26244699                      | 26244718 |                      |               |                      |          |
|             | 40                           | 40'TCTGTGTGCTGTGTATC       | 26245535                      | 26245554 |                      |               |                      |          |
|             | 41                           | 41'CAACCACTTTTACTTCTCTC    | 26246775                      | 26246797 |                      |               |                      |          |
|             | 42                           | 42'CTCAATATAGAGCAATATC     | 26247117                      | 26247140 |                      |               |                      |          |
|             | 43                           | 43'TAGATAGCTTCCAGCAAGG     | 26250951                      | 26250974 |                      |               |                      |          |
|             | 44                           | 44'GGGAGCACTATGATCAAGAG    | 26251835                      | 26251858 |                      |               |                      |          |
|             | 45                           | 45'CATAGAGTCCAGCATAAATG    | 26252880                      | 26252913 |                      |               |                      |          |
|             | 46                           | 46'CACTGTACATAGGAGCAATCTC  | 26259338                      | 26259361 |                      |               |                      |          |
|             | 47                           | 47'GACTGTAGTGGAGTATATAG    | 26267941                      | 26267964 |                      |               |                      |          |
|             | 48                           | 48'CTATCTGAGGAGAAATCTAC    | 26267431                      | 26267454 |                      |               |                      |          |
|             | 49                           | 49'AAGGCACTGTGAGTGTG       | 26243207                      | 26243226 |                      |               |                      |          |
|             | 50                           | 50'CTCATATGCTGCTCCCA       | 26263840                      | 26263863 |                      |               |                      |          |
|             | 51                           | 51'TGGCTTAGAAGTGGACAA      | 26444213                      | 26444232 |                      |               |                      |          |
|             | 52                           | 52'AAGGCGAAGTGTGTGAG       | 26444967                      | 26444986 |                      |               |                      |          |
|             | 53                           | 53'CCGCAAGAGAGTGTG         | 26444127                      | 26444146 |                      |               |                      |          |
|             | 54                           | 54'TCCAGAGAGCTCTCA         | 26444928                      | 26444947 |                      |               |                      |          |
|             | 55                           | 55'CAATGTGTAACTTGTTCAC     | 26444271                      | 26444295 |                      |               |                      |          |
|             | 56                           | 56'TGGAGAGACTTCCAGG        | 26444336                      | 26444355 |                      |               |                      |          |
|             | 57                           | 57'ATCTGCAACAGCAAGCCCT     | 26244140                      | 26244159 |                      |               |                      |          |
|             | 58                           | 58'CACTGTTATGCTCACTCTC     | 26244438                      | 26244457 |                      |               |                      |          |
|             | 59                           | 59'CAATAGCATATCACTCTC      | 27046481                      | 27046507 |                      |               |                      |          |
|             | 60                           | 60'CTCTGTGCTGTGATATC       | 27047343                      | 27047362 |                      |               |                      |          |
|             | 61                           | 61'CCCAAGCACTGACTCTCT      | 27350531                      | 27350554 |                      |               |                      |          |
|             | 62                           | 62'CATGCACTGTGTAGGAGAG     | 27351345                      | 27351364 |                      |               |                      |          |
|             | 63                           | 63'CACTTCACTCTCTCACTG      | 27360252                      | 27360273 |                      |               |                      |          |
|             | 64                           | 64'GGGATTAATCTGTGTATG      | 27361138                      | 27361157 |                      |               |                      |          |
|             | 65                           | 65'GTGAAATCTGCTTTAAGGG     | 27367034                      | 27367055 |                      |               |                      |          |
|             | 66                           | 66'GAGTGAATCTCTGAGTGTG     | 27367494                      | 27367513 |                      |               |                      |          |
|             | 67                           | 67'CAATGACTTATGCTCAATG     | 28244026                      | 28244045 |                      |               |                      |          |
|             | 68                           | 68'CCCTAATGAAAGCAAGCTAG    | 28245728                      | 28245747 |                      |               |                      |          |
|             | 69                           | 69'CCGCAATGAGCAAGCCCA      | 28207181                      | 28207200 |                      |               |                      |          |
|             | 70                           | 70'ACAGAGGCTGATAGTCAAA     | 28307728                      | 28307747 |                      |               |                      |          |
|             | 71                           | 71'TGAAATGCAACTACTGGGA     | 28408368                      | 28408387 |                      |               |                      |          |
|             | 72                           | 72'TGTAGCTGCTGATGGCA       | 28408748                      | 28408767 |                      |               |                      |          |
|             | 73                           | 73'ACAGAGAGGAGATCACTT      | 28508480                      | 28508509 |                      |               |                      |          |
|             | 74                           | 74'CACTGCAATGTGTGTGAA      | 28509045                      | 28509064 |                      |               |                      |          |
|             | 75                           | 75'CAAGCAAGTTTGAAGCAAT     | 28612113                      | 28612132 |                      |               |                      |          |
|             | 76                           | 76'TGCTCCCTCTGCTGTGA       | 28613007                      | 28613026 |                      |               |                      |          |
|             | 77                           | 77'GGTCTCAACTGCTGCA        | 28812182                      | 28812201 |                      |               |                      |          |
|             | 78                           | 78'CACTGCACTAGAGGCTTG      | 28813040                      | 28813059 |                      |               |                      |          |
|             | 79                           | 79'GGGATGATGCTATGAGGGGA    | 28914218                      | 28914239 |                      |               |                      |          |
|             | 80                           | 80'GATCTGAGAGCACTTACG      | 28914710                      | 28914730 |                      |               |                      |          |
|             | 81                           | 81'ACTGCTGAGCAATGAGAT      | 29046624                      | 29046645 |                      |               |                      |          |
|             | 82                           | 82'CAAGCAAGGATTTGAGAAGCA   | 29016999                      | 29017023 |                      |               |                      |          |
|             | 83                           | 83'ATTTTCCAGAGCACTGTGGA    | 29244273                      | 29244294 |                      |               |                      |          |
|             | 84                           | 84'CTGCTGCTCTTGAAGC        | 29245428                      | 29245448 |                      |               |                      |          |
|             | 85                           | 85'ATGCTGCTCTCTAGAGAG      | 29242426                      | 29242436 |                      |               |                      |          |
|             | 86                           | 86'CTCTGCTCTCTAGAGCT       | 29225530                      | 29225550 |                      |               |                      |          |
|             | 87                           | 87'CTGCACTTGTGAGTGTG       | 29226541                      | 29226560 |                      |               |                      |          |
|             | 88                           | 88'AGAGAGGATGATCACTCTCTG   | 29237146                      | 29237169 |                      |               |                      |          |
|             | 89                           | 89'CTCAAGAGCACTCTTGAGC     | 29823215                      | 29823233 |                      |               |                      |          |
|             | 90                           | 90'CACTGCTCTCTCTATGATA     | 29613046                      | 29613025 |                      |               |                      |          |
|             | 91                           | 91'CTCTTGGTGAATGTTCTC      | 29626056                      | 29626027 |                      |               |                      |          |
|             | 92                           | 92'CTCTGGAATGATAGAG        | 29621274                      | 29621255 |                      |               |                      |          |
|             | 93                           | 93'AGTAAAGCTCTCACTCTG      | 30227121                      | 30227142 |                      |               |                      |          |
|             | 94                           | 94'CACTTACTGCTGATAGCTG     | 30227444                      | 30227423 |                      |               |                      |          |
|             | 95                           | 95'TTCTCACTCTACTCA         | 30530417                      | 30530438 |                      |               |                      |          |
|             | 96                           | 96'CCCTGATTAAGACAGAGAG     | 30531022                      | 30531001 |                      |               |                      |          |
|             | 97                           | 97'CTGAAATCTGATGACTCT      | 30849888                      | 30849869 |                      |               |                      |          |
|             | 98                           | 98'CTGAAATGAGTCAAGATC      | 30827170                      | 30827149 |                      |               |                      |          |
|             | 99                           | 99'ACTTCTGAGATCACTG        | 31134433                      | 31134454 |                      |               |                      |          |
|             | 100                          | 100'GAACTGCAATGTTGATGAT    | 31135070                      | 31135049 |                      |               |                      |          |
|             | 101                          | 101'GCTGCAAGTTGGGGAGC      | 31450263                      | 31450282 |                      |               |                      |          |
|             | 102                          | 102'GGTGGAGCACTGATCTCA     | 31440945                      | 31440964 |                      |               |                      |          |
|             | 103                          | 103'GAGAGGAGCACTCTCTC      | 31553528                      | 31553548 |                      |               |                      |          |
|             | 104                          | 104'CCCAAGCACTTGAAGGGA     | 31553865                      | 31553885 |                      |               |                      |          |
|             | 105                          | 105'CACTCAAGCTTTTACTC      | 31653058                      | 31653077 |                      |               |                      |          |
|             | 106                          | 106'CACTCACTGATGAGAGG      | 31653881                      | 31653900 |                      |               |                      |          |
|             | 107                          | 107'TGCTAGCTGTGATGCTCT     | 31734113                      | 31734132 |                      |               |                      |          |
|             | 108                          | 108'TTCTGCTGATGAGGGCT      | 31733773                      | 31733792 |                      |               |                      |          |
|             | 109                          | 109'TCCCACTGTAAAGTGAAT     | 31814038                      | 31814059 |                      |               |                      |          |
|             | 110                          | 110'CCCTTATAGAGCAAGAGC     | 31814405                      | 31814424 |                      |               |                      |          |
|             | 111                          | 111'GCTCTTCTGAGAGGCTT      | 31835312                      | 31835331 |                      |               |                      |          |
|             | 112                          | 112'AGGGATAGAGAAATGCTC     | 31835750                      | 31835769 |                      |               |                      |          |
|             | 113                          | 113'ACTGGATTCAGGGGGGA      | 31835378                      | 31835397 |                      |               |                      |          |
|             | 114                          | 114'GGGATTTCTGAGTGGC       | 31835841                      | 31835860 |                      |               |                      |          |
|             | 115                          | 115'CAACCAATGAGCTGGGAG     | 31843357                      | 31843376 |                      |               |                      |          |
|             | 116                          | 116'AGGCAATCACTGATGCCA     | 31845032                      | 31845051 |                      |               |                      |          |
|             | 117                          | 117'CTTTAGGGAGAGGCTT       | 31858072                      | 31858091 |                      |               |                      |          |
|             | 118                          | 118'AGGASCTTCAAGATAGCA     | 31858641                      | 31858660 |                      |               |                      |          |
|             | 119                          | 119'CAATTTGACCAACTGCTCT    | 31859222                      | 31859244 |                      |               |                      |          |
|             | 120                          | 120'AAAGCAAGGATGCTG        | 31859790                      | 31859779 |                      |               |                      |          |
|             | 121                          | 121'GGTGAAGCTGTAGTCTCT     | 31860531                      | 31860550 |                      |               |                      |          |
|             | 122                          | 122'GAGAGAGATGAATGGGTT     | 31861070                      | 31861092 |                      |               |                      |          |
|             | 123                          | 123'TCTTAAACAAAGCAAGTGTG   | 31864729                      | 31864748 |                      |               |                      |          |
|             | 124                          | 124'TCAAGAGGCTTCTCTGTG     | 31865152                      | 31865171 |                      |               |                      |          |
|             | 125                          | 125'TCCCAAGAGTGGAGCC       | 31867380                      | 31867359 |                      |               |                      |          |
|             | 126                          | 126'CCCTGAATGTAAGCAGTGA    | 31867961                      | 31867980 |                      |               |                      |          |
|             | 127                          | 127'CTCTCTCTCTGAGTGA       | 31871007                      | 31871026 |                      |               |                      |          |
|             | 128                          | 128'AGGATGCTCAAGAGGCA      | 31871204                      | 31871224 |                      |               |                      |          |
|             | 129                          | 129'CTGGGAGATGCTATGAGCT    | 31872250                      | 31872273 |                      |               |                      |          |
|             | 130                          | 130'TCTTGGAGCACTTACACAA    | 31872733                      | 31872755 |                      |               |                      |          |
|             | 131                          | 131'ACTTTTCTGATCATCTTT     | 31876063                      | 31876076 |                      |               |                      |          |
|             | 132                          | 132'ATCAAGCACTTTTGAAGAG    | 31876779                      | 31876801 |                      |               |                      |          |
|             | 133                          | 133'GGGAGAGCACTACTGG       | 31880639                      | 31880637 |                      |               |                      |          |
|             | 134                          | 134'GCTATTCTGAACATGAGCA    | 31880668                      | 31880688 |                      |               |                      |          |
|             | 135                          | 135'TAGACTCAGAGATGGGCA     | 31901007                      | 31901027 |                      |               |                      |          |
|             | 136                          | 136'CACTGTCTCTCAAGCT       | 31901033                      | 31901047 |                      |               |                      |          |
|             | 137                          | 137'GGAGAGCTCTCTCAAA       | 31913379                      | 31913398 |                      |               |                      |          |
|             | 138                          | 138'CTCCACAGCACTTACAG      | 31913914                      | 31913933 |                      |               |                      |          |
|             | 139                          | 139'CCCTTCACTCTCTCTC       | 32013183                      | 32013180 |                      |               |                      |          |
|             | 140                          | 140'AGGCTCTTGAAGAGCTG      | 32013719                      | 32013738 |                      |               |                      |          |
|             | 141                          | 141'GCACTTTCTCATGATTC      | 32124473                      | 32124494 |                      |               |                      |          |
|             | 142                          | 142'CACTCACTGATTTGATCT     | 32124487                      | 32124497 |                      |               |                      |          |
|             | 143                          | 143'CCCTTAGAAGCACTCGGT     | 32124343                      | 32124362 |                      |               |                      |          |
|             | 144                          | 144'GTCCCTCTACAGCAATGT     | 32124733                      | 32124752 |                      |               |                      |          |
|             | 145                          | 145'CAACACTTCTATGATCTTAGG  | 26237849                      | 26237872 |                      |               |                      |          |
|             | 146                          | 146'CTCGAATCTTCAACGATCTCAC | 31870309                      | 31870332 |                      |               |                      |          |
|             | 147                          | 147'CTGAGGATTCAGTGGAGCAAT  | 26238779                      | 26238803 |                      |               |                      |          |
|             | 148                          | 148'AAAGAGCTCAAGGACTGTGAGC | 26239821                      | 26239845 |                      |               |                      |          |
|             | 149                          | 149'CTAGCTTACAGTGTAGGCTTC  |                               |          |                      |               |                      |          |
|             | 150                          | 150'CACTGATGAGTGGATGAGG    |                               |          |                      |               |                      |          |
|             | 151                          | 151'CGGCTAAGGATCCACTCTC    |                               |          |                      |               |                      |          |
|             | 152                          | 152'GACTTTAGGGCACTCTCTG    |                               |          |                      |               |                      |          |
|             | 153                          | 153'GTGAGCTCTCTGAGCACTGAG  |                               |          |                      |               |                      |          |
|             | 154                          | 154'GGTCTCTGCGAGGCTCTCT    |                               |          |                      |               |                      |          |
| 155         | 155'TGGAGAGGCGCCAGGCGAGG     |                            |                               |          |                      |               |                      |          |
| 156         | 156'CTGAACTCTCAAGCACTCAC     |                            |                               |          |                      |               |                      |          |
| 157         | 157'GAGATGGCCAGGCTGGGCTGGA   |                            |                               |          |                      |               |                      |          |
| 158         | 158'CAACACTATGATGATCTTAGG    |                            |                               |          |                      |               |                      |          |
| 159         | 159'TTCTGGCAACTGGAGATGG      |                            |                               |          |                      |               |                      |          |
| 160         | 160'GAGGCACTGACTGTGAGCACTGAG |                            |                               |          |                      |               |                      |          |

Figure S9. Detailed primer information. Primer numbers, sequences, annealing locations, annealing temperatures, expected amplicon size, and amplification results are provided.

**Data S1.** Results from HMMER search of reference proteomes using exon 2 peptide sequence of dog LOC612257 as query. Available as separate .txt file.

**Data S2.** tBLASTn output for all queried species. Each species is provided in a separate sheet. Detailed information for each hit is provided, and hits remaining after each filtering criteria was applied are indicated in separate columns. Available as separate .xls file.

| Region | Figure Designation | Species        | tBLASTn Hit Location on X-Chromosome |          | Orientation  | NCBI Gene Symbol                             | NCBI Gene Type                           | NCBI Gene Description                                   |
|--------|--------------------|----------------|--------------------------------------|----------|--------------|----------------------------------------------|------------------------------------------|---------------------------------------------------------|
| A      | A1                 | H. sapiens     | 31071953                             | 31071402 | -            | FTHL17                                       | protein coding                           | ferritin, heavy polypeptide-like 17                     |
|        | A1                 | P. troglodytes | 31285760                             | 31285209 | -            | FTHL17                                       | protein coding                           | ferritin, heavy polypeptide-like 17                     |
|        | A1                 | M. musculus    | 85249677                             | 85270291 | +            | Fthl17a                                      | protein coding                           | ferritin, heavy polypeptide-like 17, member A           |
|        | A1                 | C. familiaris  | 26238702                             | 26238481 | -            | N.A.: region is within a genome assembly gap |                                          |                                                         |
|        | A1                 | F. catus       | 26476187                             | 26475666 | -            | FTHL17                                       | protein coding                           | ferritin, heavy polypeptide-like 17                     |
|        | A1                 | S. scrofa      | 29274687                             | 29275602 | -            | FTHL17                                       | protein coding                           | ferritin, heavy polypeptide-like 17                     |
| B      | B1                 | H. sapiens     | 34147040                             | 34147516 | +            | FTHP14                                       | pseudo                                   | ferritin, heavy polypeptide 1 pseudogene 14             |
|        | B1                 | P. troglodytes | 34435114                             | 34435590 | +            | LOC473555                                    | pseudo                                   | ferritin heavy polypeptide-like 17                      |
|        | B1                 | C. familiaris  | 29541841                             | 29542399 | +            | LOC102153989                                 | pseudo                                   | ferritin, heavy polypeptide 1 pseudogene                |
|        | B1                 | F. catus       | 29786714                             | 29787235 | +            | LOC101099617                                 | pseudo                                   | ferritin heavy chain pseudogene                         |
|        | B1                 | S. scrofa      | 33806868                             | 33807345 | +            | LOC100156789                                 | pseudo                                   | uncharacterized LOC100156789                            |
| C      | C1                 | H. sapiens     | 37043556                             | 37043023 | -            | FTHP18                                       | protein coding                           | ferritin, heavy polypeptide 1 pseudogene 18             |
|        | C2                 |                | 37078401                             | 37077851 | -            | LOC442445                                    | pseudo                                   | ferritin, heavy polypeptide-like 17 pseudogene          |
|        | C1                 |                | 37523369                             | 37522836 | -            | FTHP18                                       | protein coding                           | ferritin, heavy polypeptide 1 pseudogene 18             |
|        | C2                 | P. troglodytes | 37558036                             | 37557519 | -            | LOC473865                                    | pseudo                                   | ferritin heavy polypeptide-like 17                      |
|        | C1                 | M. musculus    | 8962820                              | 8962302  | -            | Gm5634                                       | protein coding                           | predicted gene 5634; also known as Fthl17L1             |
|        | C2                 |                | 8976404                              | 8975886  | -            | Gm14511                                      | protein coding                           | predicted gene 14511; also known as Fthl17L2            |
|        | C3                 |                | 8986586                              | 8986071  | -            | Gm14458                                      | protein coding                           | predicted gene 14458; also known as Fthl17L3            |
|        | C1                 | C. familiaris  | 31869618                             | 31869060 | -            | LOC612257                                    | protein coding                           | ferritin heavy chain-like                               |
|        | C1                 | F. catus       | 32359520                             | 32358999 | -            | LOC101085694                                 | pseudo                                   | ferritin heavy chain pseudogene                         |
|        | C1                 | S. scrofa      | 36502806                             | 36502341 | -            | LOC100624935                                 | pseudo                                   | ferritin heavy chain-like                               |
|        | C2                 |                | 36562089                             | 36561544 | -            | LOC100624737                                 | protein coding                           | ferritin heavy chain-like                               |
| D1     | 37441523           |                | 37442074                             | +        | LOC100420326 | pseudo                                       | ferritin, heavy polypeptide 1 pseudogene |                                                         |
| D      | D2                 | H. sapiens     | 37492021                             | 37492539 | +            | FTHP19                                       | pseudo                                   | ferritin, heavy polypeptide 1 pseudogene 19             |
|        | D3                 |                | 37505334                             | 37505854 | +            | FTHP27                                       | pseudo                                   | ferritin, heavy polypeptide 1 pseudogene 27             |
|        | D1                 |                | P. troglodytes                       | 37772599 | 37773090     | +                                            | LOC737664                                | protein coding                                          |
|        | D1                 | M. musculus    | 78470555                             | 78470058 | -            | Prrg1                                        | protein coding                           | proline rich Gla (G-carboxyglutamic acid) 1             |
|        | D2                 |                | 9033647                              | 9034162  | +            | Fthl17                                       | protein coding                           | ferritin, heavy polypeptide-like 17                     |
|        | D3                 |                | 9043736                              | 9044239  | +            | Gm14499                                      | protein coding                           | predicted gene 14499; also known as Fthl17L4            |
|        | D4                 |                | 9063176                              | 9063694  | +            | Gm5635                                       | protein coding                           | predicted gene 5635; also known as Fthl17L5             |
|        | D5                 |                | 9080053                              | 9080571  | +            | Gm6826                                       | pseudo                                   | predicted gene 6826; also known as Fthl17L6             |
|        | D6                 |                | 9123467                              | 9123979  | +            | Gm5753                                       | pseudo                                   | ferritin heavy chain 1 pseudogene                       |
|        | D1                 | C. familiaris  | 32108753                             | 32109313 | +            | LOC100687930                                 | pseudo                                   | ferritin, heavy polypeptide 1 pseudogene                |
|        | D2                 |                | 32205689                             | 32206259 | +            | FTHP18                                       | protein coding                           | ferritin heavy chain-like                               |
|        | D3                 |                | 32293541                             | 32294101 | +            | LOC612281                                    | pseudo                                   | ferritin, heavy polypeptide 1 pseudogene                |
|        | D1                 | F. catus       | 32571487                             | 32572008 | +            | LOC102901113                                 | protein coding                           | ferritin heavy chain-like                               |
|        | D2                 |                | 32650295                             | 32650834 | +            | LOC101082216                                 | pseudo                                   | ferritin heavy chain pseudogene                         |
|        | D3                 |                | 32724236                             | 32724775 | +            | LOC101082471                                 | pseudo                                   | ferritin heavy chain pseudogene                         |
|        | D1                 | S. scrofa      | 36440389                             | 36440925 | +            | LOC102167173                                 | protein coding                           | ferritin heavy chain-like                               |
|        | D2                 |                | 36839450                             | 36839944 | +            | LOC100623926                                 | protein coding                           | transmembrane gamma-carboxyglutamic acid protein 1-like |
|        | D3                 |                | 36922815                             | 36923360 | +            | LOC106506938                                 | protein coding                           | leucine-rich repeat extensin-like protein 5             |
|        | D4                 |                | 37010756                             | 37011292 | +            | LOC100625618                                 | protein coding                           | ferritin heavy chain-like                               |

**Table S1.** Summary of returned tBLASTn hits from multiple species.
